# Supplementary material for: A Comparison of Methods for Clustering 16S rRNA Sequences into OTUs
Source: PubMed Central journal article supplement (PMC3742672; doi:10.1371/journal.pone.0070837), 2013-08-13
Supplement: pone.0070837.s004.pdf [file pone.0070837.s004.pdf]

Table S1 Numbers of inferred OTUs from different dissimilarity thresholds across different algorithms

| DATA SET     |                   | Algorithms |             |        |               |     |      |        |          |             |        |
|--------------|-------------------|------------|-------------|--------|---------------|-----|------|--------|----------|-------------|--------|
|              |                   | ESPRIT     | ESPRIT-Tree | Mothur | Muscle+Mothur | SLP | CROP | CD-HIT | DNAClust | GramCluster | Uclust |
| Simclone15_2 | Expect OTUs       | 15         |             |        |               |     |      |        |          |             |        |
|              | inferred OTUs(2%) | 184        | 134         | 73     | 144           | 16  | 24   | 59     | 321      | 84          | 87     |
|              | inferred OTUs(3%) | 184        | 40          | 47     | 112           | 16  | 16   | 60     | 286      | 84          | 83     |
|              | inferred OTUs(4%) | 71         | 20          | 18     | 73            | 15  | 16   | 33     | 68       | 84          | 57     |
| Simclone10_1 | Expect OTUs       | 10         |             |        |               |     |      |        |          |             |        |
|              | inferred OTUs(2%) | 1308       | 30          | 410    | 1135          | 10  | 10   | 55     | 847      | 973         | 265    |
|              | inferred OTUs(3%) | 202        | 10          | 17     | 210           | 9   | 10   | 17     | 100      | 936         | 55     |
|              | inferred OTUs(4%) | 40         | 8           | 9      | 31            | 8   | 8    | 10     | 25       | 155         | 36     |
| Simclone10_2 | Expect OTUs       | 10         |             |        |               |     |      |        |          |             |        |
|              | inferred OTUs(2%) | 291        | 19          | 48     | 190           | 10  | 10   | 32     | 228      | 360         | 84     |
|              | inferred OTUs(3%) | 34         | 10          | 10     | 35            | 9   | 10   | 10     | 45       | 336         | 41     |
|              | inferred OTUs(4%) | 13         | 9           | 9      | 12            | 8   | 10   | 10     | 13       | 65          | 22     |
| Simclone20   | Expect OTUs       | 20         |             |        |               |     |      |        |          |             |        |
|              | inferred OTUs(2%) | 477        | 58          | 77     | 269           | 19  | 21   | 59     | 396      | 410         | 133    |
|              | inferred OTUs(3%) | 74         | 19          | 23     | 71            | 18  | 21   | 31     | 83       | 396         | 64     |
|              | inferred OTUs(4%) | 21         | 17          | 19     | 29            | 17  | 18   | 24     | 32       | 83          | 51     |
| Simclone30   | Expect OTUs       | 30         |             |        |               |     |      |        |          |             |        |
|              | inferred OTUs(2%) | 338        | 108         | 95     | 240           | 33  | 35   | 104    | 440      | 551         | 161    |
|              | inferred OTUs(3%) | 940        | 31          | 28     | 64            | 26  | 30   | 31     | 111      | 544         | 81     |
|              | inferred OTUs(4%) | 31         | 25          | 26     | 32            | 23  | 21   | 29     | 36       | 128         | 54     |
| Simclone50   | Expect OTUs       | 50         |             |        |               |     |      |        |          |             |        |
|              | inferred OTUs(2%) | 435        | 160         | 152    | 393           | 55  | 57   | 122    | 654      | 884         | 237    |
|              | inferred OTUs(3%) | 113        | 46          | 46     | 104           | 40  | 45   | 53     | 150      | 899         | 131    |
|              | inferred OTUs(4%) | 44         | 38          | 36     | 46            | 35  | 37   | 45     | 55       | 218         | 89     |
| Simclone100  | Expect OTUs       | 100        |             |        |               |     |      |        |          |             |        |
|              | inferred OTUs(2%) | 652        | 235         | 215    | 452           | 96  | 100  | 184    | 845      | 1095        | 337    |
|              | inferred OTUs(3%) | 212        | 92          | 93     | 147           | 75  | 82   | 99     | 225      | 1071        | 206    |
|              | inferred OTUs(4%) | 91         | 64          | 71     | 92            | 63  | 70   | 86     | 106      | 283         | 128    |
| Simclone150  | Expect OTUs       | 150        |             |        |               |     |      |        |          |             |        |
|              | inferred OTUs(2%) | 1026       | 400         | 353    | 766           | 153 | 162  | 327    | 1424     | 1742        | 511    |
|              | inferred OTUs(3%) | 338        | 138         | 145    | 233           | 112 | 112  | 149    | 393      | 1747        | 332    |
|              | inferred OTUs(4%) | 133        | 96          | 110    | 132           | 93  | 71   | 129    | 171      | 484         | 205    |
| Simclone200  | Expect OTUs       | 200        |             |        |               |     |      |        |          |             |        |
|              | inferred OTUs(2%) | 1194       | 453         | 403    | 851           | 189 | 178  | 390    | 1668     | 1926        | 672    |
|              | inferred OTUs(3%) | 395        | 175         | 185    | 295           | 144 | 122  | 196    | 429      | 1919        | 975    |
|              | inferred OTUs(4%) | 174        | 128         | 141    | 185           | 114 | 84   | 166    | 202      | 534         | 255    |
