# Supplementary material for: A Comparison of Methods for Clustering 16S rRNA Sequences into OTUs
Source: PubMed Central journal article supplement (PMC3742672; doi:10.1371/journal.pone.0070837), 2013-08-13
Supplement: pone.0070837.s005.pdf [file pone.0070837.s005.pdf]

Table S2: The results of OTUs estimated with different frequency thresholds

| DATA SET     |               | # of OTU (0.03 dissimilarity) |             |        |               |     |      |        |          |             |        |
|--------------|---------------|-------------------------------|-------------|--------|---------------|-----|------|--------|----------|-------------|--------|
|              |               | ESPRIT                        | ESPRIT-Tree | Mothur | Muscle+Mothur | SLP | CROP | CD-HIT | DNAClust | GramCluster | Uclust |
| Clone43      | All sequences | 4397                          | 1096        | 720    | 1418          | 245 | 133  | 1464   | 3658     | 2071        | 1883   |
|              | Abundant_10   | 580                           | 55          | 56     | 87            | 45  | 44   | 118    | 527      | 313         | 82     |
|              | Abundant_50   | 104                           | 40          | 41     | 75            | 41  | 40   | 70     | 110      | 65          | 73     |
|              | Abundant_100  | 57                            | 38          | 40     | 58            | 39  | 38   | 53     | 60       | 47          | 56     |
|              | Abundant_150  | 35                            | 36          | 36     | 37            | 36  | 36   | 37     | 38       | 37          | 38     |
| Simclone15_1 | All sequences | 131                           | 29          | 41     | 89            | 17  | 15   | 49     | 225      | 70          | 35     |
|              | Abundant_10   | 30                            | 16          | 22     | 27            | 15  | 15   | 20     | 63       | 20          | 21     |
|              | Abundant_50   | 18                            | 15          | 15     | 20            | 15  | 15   | 16     | 33       | 15          | 16     |
|              | Abundant_100  | 13                            | 15          | 15     | 16            | 15  | 15   | 16     | 20       | 15          | 15     |
|              | Abundant_150  | 13                            | 15          | 15     | 16            | 15  | 15   | 16     | 19       | 15          | 15     |
| Simclone15_2 | All sequences | 184                           | 40          | 47     | 112           | 16  | 16   | 60     | 286      | 84          | 83     |
|              | Abundant_10   | 49                            | 15          | 27     | 39            | 15  | 15   | 27     | 92       | 31          | 39     |
|              | Abundant_50   | 27                            | 15          | 15     | 20            | 15  | 15   | 17     | 50       | 20          | 24     |
|              | Abundant_100  | 19                            | 15          | 15     | 18            | 15  | 15   | 16     | 31       | 16          | 17     |
|              | Abundant_150  | 14                            | 15          | 15     | 16            | 15  | 15   | 16     | 22       | 16          | 16     |
| Simclone10_1 | All sequences | 202                           | 10          | 17     | 210           | 9   | 10   | 17     | 100      | 936         | 55     |
|              | Abundant_10   | 10                            | 9           | 10     | 10            | 9   | 9    | 10     | 10       | 26          | 10     |
|              | Abundant_50   | 10                            | 9           | 10     | 10            | 9   | 9    | 10     | 10       | 14          | 10     |
|              | Abundant_100  | 9                             | 10          | 10     | 10            | 9   | 8    | 9      | 10       | 11          | 9      |
|              | Abundant_150  | 9                             | 9           | 10     | 10            | 9   | 8    | 9      | 9        | 11          | 9      |
| Simclone10_2 | All sequences | 34                            | 10          | 10     | 35            | 9   | 10   | 10     | 45       | 336         | 41     |
|              | Abundant_10   | 8                             | 9           | 10     | 10            | 9   | 10   | 10     | 10       | 24          | 11     |
|              | Abundant_50   | 7                             | 9           | 10     | 10            | 9   | 9    | 10     | 10       | 10          | 10     |
|              | Abundant_100  | 7                             | 9           | 10     | 10            | 9   | 8    | 10     | 10       | 10          | 10     |
|              | Abundant_150  | 7                             | 9           | 10     | 10            | 9   | 9    | 10     | 10       | 10          | 10     |
| Simclone20   | All sequences | 74                            | 19          | 23     | 71            | 18  | 21   | 31     | 83       | 396         | 64     |
|              | Abundant_10   | 16                            | 18          | 20     | 29            | 18  | 20   | 21     | 27       | 34          | 25     |
|              | Abundant_50   | 16                            | 18          | 20     | 22            | 18  | 18   | 20     | 24       | 22          | 22     |
|              | Abundant_100  | 15                            | 18          | 19     | 19            | 18  | 17   | 19     | 19       | 21          | 19     |
|              | Abundant_150  | 15                            | 18          | 19     | 19            | 18  | 18   | 19     | 19       | 21          | 19     |

Abundant\_x: the sequences in the data set with a frequency >=x
